# Supplementary material
Source: Springer Nature journal article supplement (https://www.springermedizin.de/resource/supplementary/12967_2012_1558_MOESM2_ESM.pdf/9574322)
Supplement: MOESM2 [file 9574322]

**Supplementary Table. Performance of PSP/reg1A and hsCRP as individual or combined classifiers to distinguish HNF1A- from HNF4A-MODY**

|                                                                            | <b>Sensitivity</b> | <b>Specificity</b> |
|----------------------------------------------------------------------------|--------------------|--------------------|
| <b>ROC: HNF1A if PSP &gt; 9.34 ng/ml</b>                                   | 90 %               | 67 %               |
| <b>ROC: HNF1A if CRP &lt; 0.36 mg/L</b>                                    | 73 %               | 89 %               |
| <b>ROC: HNF1A if PSP/CRP &gt; 0.03</b>                                     | 79 %               | 89 %               |
| <b>LDA: HNF1A if <math>1.30 - 0.10 \cdot \text{PSP} &lt; 0</math></b>      | 42 %               | 78 %               |
| <b>LDA: HNF1A if <math>0.03 - 0.01 \cdot \text{CRP} &lt; 0</math></b>      | 12 %               | 89 %               |
| <b>LDA: HNF1A if <math>0.96 - 24.28 \cdot \text{PSP/CRP} &lt; 0</math></b> | 64 %               | 89 %               |

This data includes all subjects. Classification rule shows the statistical method and the final rule to determine HNF1A-MODY. Sensitivity gives the percentage of correctly identified HNF1A-MODY; specificity shows the percentage of correctly identified HNF4A-MODY.
